# Supplementary material for: Why is Trichodesmium abundant in the Kuroshio?
Source: Copernicus journal article supplement (doi:10.5194/bg-12-6931-2015), 2015-12-04
Supplement: Supplementary file 1 [file bg-12-6931-2015-supplement.pdf]

Supplement of Biogeosciences, 12, 6931–6943, 2015  
<http://www.biogeosciences.net/12/6931/2015/>  
doi:10.5194/bg-12-6931-2015-supplement  
© Author(s) 2015. CC Attribution 3.0 License.

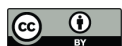

*Supplement of*

## **Why is *Trichodesmium* abundant in the Kuroshio?**

**T. Shiozaki et al.**

*Correspondence to:* T. Shiozaki ([shiozaki@aori.u-tokyo.ac.jp](mailto:shiozaki@aori.u-tokyo.ac.jp))

The copyright of individual parts of the supplement might differ from the CC-BY 3.0 licence.

## SUPPORTING INFORMATION

### *Nitrate, nitrite, and ammonium contamination in $^{15}\text{N}_2$ gas*

#### Materials and Methods

$^{15}\text{N}_2$  gas supplied by SI Science Co., Ltd was used during all of the cruises. We performed the following experiments to examine possible contamination of nitrate, nitrite, and ammonium in the  $^{15}\text{N}_2$  gas (Dabundo et al., 2014).

Experiment 1: Ten 250 mL PC bottles were filled with aged subtropical surface water (ASSW), and were sealed with thermoplastic elastomer caps without headspaces. 2 mL 98 at%  $^{15}\text{N}_2$  gas (batch #11059) was added to five of these bottles and mixed well. All of the bottles were kept at room temperature for at least 12 h, and the water was subsampled to a 30 mL polypropylene tube.

Experiment 2: Degassed seawater was mixed from the ASSW using a Sterapore membrane unit (20M1500A: Mitsubishi Rayon Co., Ltd., Tokyo, Japan) (Shiozaki et al., 2015), and stored in three 1 L Tedlar bags without headspaces. A different batch number of  $^{15}\text{N}_2$  gas (#11059 and #11143) was added to two of these bags. The  $^{15}\text{N}_2$  gas was injected at a ratio of 10 mL per 1 L seawater, and dissolved completely using a ruler (Großkopf et al., 2012). The  $^{15}\text{N}_2$ -enriched and non- $^{15}\text{N}_2$ -enriched seawater

19 samples were subsampled to five 30 mL polypropylene tubes from each Tedlar bags.

20 We determined the concentrations of nitrate, nitrite, and ammonium at the  
21 nanomolar levels using supersensitive colorimetric systems (Hashihama et al., 2009,  
22 2015). The detection limits of nitrate, nitrite, and ammonium were 3, 2, and 4 nM,  
23 respectively.

## 24 25 **Results and Discussion**

26 In both experiments, there were no significant differences between the control and  
27  $^{15}\text{N}_2$ -added samples or among different batch numbers of  $^{15}\text{N}_2$  gas, with one exception;  
28 the nitrite concentration in the  $^{15}\text{N}_2$  (#11143)-added samples was significantly lower  
29 than that of the control in Experiment 2 ( $p < 0.05$ ,  $t$ -test) (Fig. S1a and b). Because we  
30 did not determine the  $^{15}\text{N}/^{14}\text{N}$  ratios of nitrate, nitrite, and ammonium, the  
31 contamination at isotope level was not evaluated. The contamination of nitrate, nitrite,  
32 and ammonium in the 250 ml of seawater with 2 ml  $^{15}\text{N}_2$  gas was undetectable ( $< \text{nM}$   
33 level) in experiment 1. During the cruise experiments, we added 2 ml  $^{15}\text{N}_2$  gas into 4.5  
34 L seawater, and hence, the contamination level would be one order lower than that in  
35 experiment 1, indicating that  $^{15}\text{N}$ -labeled substrates in the seawater were at most  $10^{-2}$   
36 nM. When the substrate concentration in the seawater was 3 nM (the detection limit of

our analysis), the concentration of  $^{15}\text{N}$ -labeled substrate would be  $<1/100$  lower than that of seawater. In this case, the  $^{15}\text{N}$  concentration would be too low to detect the uptake rate (Shiozaki et al., 2009).

Dabundo et al. (2014) found contamination of  $^{15}\text{N}_2$  gas supplied from Sigma-Aldrich and from Cambridge Isotopes and suggested that the contamination could be caused by the production method of the  $^{15}\text{N}_2$  gas. The  $^{15}\text{N}_2$  gas of the two companies is produced by the catalytic oxidation of  $^{15}\text{NH}_3$  gas with cupric oxide (Dabundo et al., 2014), whereas the SI Science  $^{15}\text{N}_2$  gas is produced by oxidation of  $^{15}\text{N}$ -labeled ammonium sulfate with potassium hypobromite (Nakane, 1963). Surplus potassium hypobromite is added to avoid ammonia and  $\text{NO}_x$  gas generation, and the  $^{15}\text{N}_2$  gas is purified using a molecular sieve and liquid nitrogen. This different production process from that used by Sigma-Aldrich and Cambridge Isotopes probably explains why there is little contamination of nitrate, nitrite, and ammonium in the  $^{15}\text{N}_2$  gas produced by SI Science.

## REFERENCES

Shiozaki, T., Nagata, T., Ijichi, M., Furuya, K.: Nitrogen fixation and the diazotroph community in the temperate coastal region of the northwestern North Pacific,



56 Biogeosciences, 12, 4751-4764, 2015.

57 Hashihama, F., Kanda, J., Tauchi, A., Kodama, T., Saito, H., Furuya, K.: Liquid  
58 waveguide spectrophotometric measurement of nanomolar ammonium in seawater  
59 based on the indophenol reaction with o-phenylphenol (OPP), Talanta, 143,  
60 374-380, 2015.

61 Nakane, R.: Measurements of isotope ratio by mass spectrometry (III): Measurements  
62 of isotope abundance ratio of nitrogen, Mass spectrometry, 22, 51-56, 1963 (in  
63 Japanese).

Table S1 Locations and obtained data at each station

| Station | Area           | Longitude | Latitude | Date (LST) | start time (LST)** | <i>Trichodesmium</i> <sup>*</sup><br>[filaments l <sup>-1</sup> ] | N <sub>2</sub> fixation <sup>*</sup><br>[nmolN L <sup>-1</sup> d <sup>-1</sup> ] | Σ N <sub>2</sub> fixation<br>[μmolN m <sup>-2</sup> d <sup>-1</sup> ] | Temperature <sup>*</sup><br>[°C] | MLD<br>[m] | NO <sub>3</sub> <sup>-</sup> +NO <sub>2</sub> <sup>-</sup><br>[nM] | PO <sub>4</sub> <sup>3-</sup><br>[nM] | N/P ratio <sup>*</sup> | DFe <sup>*</sup><br>[nM] |
|---------|----------------|-----------|----------|------------|--------------------|-------------------------------------------------------------------|----------------------------------------------------------------------------------|-----------------------------------------------------------------------|----------------------------------|------------|--------------------------------------------------------------------|---------------------------------------|------------------------|--------------------------|
| T0601   | East China Sea | 129.1     | 30.9     | 10-Sep-06  | 11:30              | 6                                                                 | 2.18                                                                             | n.a.                                                                  | 29.3                             | 32         | 3                                                                  | 9                                     | 0.33                   | 0.89                     |
| T0602   | East China Sea | 129.35    | 30.71    | 10-Sep-06  | 14:00              | 6                                                                 | 6.2                                                                              | 305                                                                   | 29.4                             | 39         | 10                                                                 | 32                                    | 0.31                   | n.a.                     |
| T0606   | Kuroshio       | 131.17    | 28.92    | 11-Sep-06  | 11:45              | 4                                                                 | 5.61                                                                             | 377                                                                   | 30.5                             | 21         | <3                                                                 | 19                                    | 0.16                   | 0.6                      |
| T0622   | East China Sea | 127.31    | 30.39    | 13-Sep-06  | 12:00              | 0                                                                 | 6.35                                                                             | 306                                                                   | 29                               | 40         | 21                                                                 | 12                                    | 1.75                   | 0.83                     |
| T0625   | East China Sea | 127.76    | 30.39    | 14-Sep-06  | 8:45               | 0                                                                 | 1.41                                                                             | 77.2                                                                  | 28.7                             | 40         | 19                                                                 | 11                                    | 1.73                   | n.a.                     |
| T0702   | East China Sea | 128.38    | 30.82    | 6-Sep-07   | 13:30              | 4                                                                 | 0.97                                                                             | 38.4                                                                  | 28.7                             | 13         | 9                                                                  | 25                                    | 0.36                   | 0.55                     |
| T0706   | Kuroshio       | 130.97    | 28.72    | 7-Sep-07   | 9:30               | 68                                                                | 1.05                                                                             | 88.1                                                                  | 29.4                             | 27         | 9                                                                  | 15                                    | 0.60                   | 0.36                     |
| T0711   | Philippine Sea | 133.17    | 26.25    | 8-Sep-07   | 9:30               | 16                                                                | 0.86                                                                             | 67.3                                                                  | 29.5                             | 26         | 10                                                                 | <3                                    | 3.33                   | 0.39                     |
| T0715   | Philippine Sea | 133.16    | 23.81    | 9-Sep-07   | 14:20              | 0                                                                 | 0.63                                                                             | 77.7                                                                  | 29.3                             | 21         | 5                                                                  | <3                                    | 1.67                   | 0.8                      |
| T0718   | Philippine Sea | 130.22    | 24.44    | 10-Sep-07  | 9:10               | 8                                                                 | 0.29                                                                             | 29.9                                                                  | 29.5                             | 23         | 10                                                                 | 36                                    | 0.28                   | 0.35                     |
| T0723   | Kuroshio       | 129.85    | 29.05    | 12-Sep-07  | 2:25               | 26                                                                | 3.58                                                                             | 251                                                                   | 29.1                             | 39         | 3                                                                  | 4                                     | 0.75                   | 0.39                     |
| GW-1    | East China Sea | 128.61    | 33.84    | 23-Jul-07  | 5:45               | 0                                                                 | 0.54                                                                             | 29.5                                                                  | 25.1                             | 17         | 42                                                                 | 17                                    | 2.47                   | n.a.                     |
| GN-3    | East China Sea | 128.57    | 33.38    | 23-Jul-07  | 15:10              | 12                                                                | 14                                                                               | n.a.                                                                  | 27.6                             | 14         | 16                                                                 | 22                                    | 0.73                   | n.a.                     |
| NW-8    | East China Sea | 129.25    | 32.24    | 25-Jul-07  | 5:25               | 0                                                                 | 1.77                                                                             | 113                                                                   | 28.6                             | 12         | 17                                                                 | 5                                     | 3.40                   | n.a.                     |
| B       | East China Sea | 127.85    | 32.25    | 25-Jul-07  | 20:15              | 0                                                                 | 5.15                                                                             | 171                                                                   | 28.6                             | 17         | 32                                                                 | 5                                     | 6.40                   | n.a.                     |
| CK-10   | East China Sea | 127.5     | 31.75    | 27-Jul-07  | 6:15               | 194                                                               | 28                                                                               | 418                                                                   | 29.4                             | 13         | 17                                                                 | 16                                    | 1.06                   | n.a.                     |
| T0902   | Miyako Islands | 125.67    | 25.13    | 10-Sep-09  | 9:50               | 2                                                                 | 0.54                                                                             | 62.7                                                                  | 29.2                             | 51         | 15                                                                 | <3                                    | 5.00                   | 0.19                     |
| T0903   | Miyako Islands | 125.43    | 25.12    | 10-Sep-09  | n.a.               | 6                                                                 | n.a.                                                                             | n.a.                                                                  | 29.2                             | 24         | 15                                                                 | <3                                    | 5.00                   | 0.35                     |
| T0904   | Miyako Islands | 125.2     | 25.07    | 10-Sep-09  | 16:25              | 2                                                                 | 0.64                                                                             | 58.9                                                                  | 29                               | 48         | 374                                                                | 23                                    | 16.3                   | 0.39                     |
| T0905   | Miyako Islands | 125.42    | 24.93    | 10-Sep-09  | 17:35              | 102                                                               | 4.37                                                                             | n.a.                                                                  | 29.7                             | 31         | 6                                                                  | 4                                     | 1.50                   | 0.2                      |
| T0906   | Miyako Islands | 125.73    | 25.19    | 10-Sep-09  | 23:50              | >20000                                                            | 62                                                                               | 753                                                                   | 29.6                             | 60         | 3                                                                  | 14                                    | 0.21                   | 0.25                     |
| T0907   | Miyako Islands | 125.57    | 24.67    | 11-Sep-09  | 11:10              | 2                                                                 | 1.66                                                                             | 49.1                                                                  | 29.2                             | 27         | 53                                                                 | 9                                     | 5.89                   | 0.89                     |
| T0908   | Miyako Islands | 125.61    | 24.92    | 11-Sep-09  | 14:05              | 10                                                                | 1.04                                                                             | 105                                                                   | 29.4                             | 40         | 4                                                                  | 5                                     | 0.80                   | 0.4                      |
| T1001   | East China Sea | 129.28    | 30.66    | 4-Sep-10   | 9:45               | 6                                                                 | 3.69                                                                             | 70                                                                    | 29.1                             | 28         | 21                                                                 | 9                                     | 2.33                   | n.a.                     |
| T1004   | Kuroshio       | 126.9     | 28.4     | 9-Sep-10   | 7:15               | 72                                                                | 3.94                                                                             | 79                                                                    | 28.6                             | 22         | 19                                                                 | 20                                    | 0.95                   | n.a.                     |
| T1007   | Miyako Islands | 125.75    | 24.6     | 11-Sep-10  | 6:50               | 24                                                                | 4.29                                                                             | 179                                                                   | 29.2                             | 40         | 15                                                                 | <3                                    | 5.00                   | n.a.                     |

\*values in the surface water

\*\*start time of incubation for nitrogen fixation

n.a. = no data available

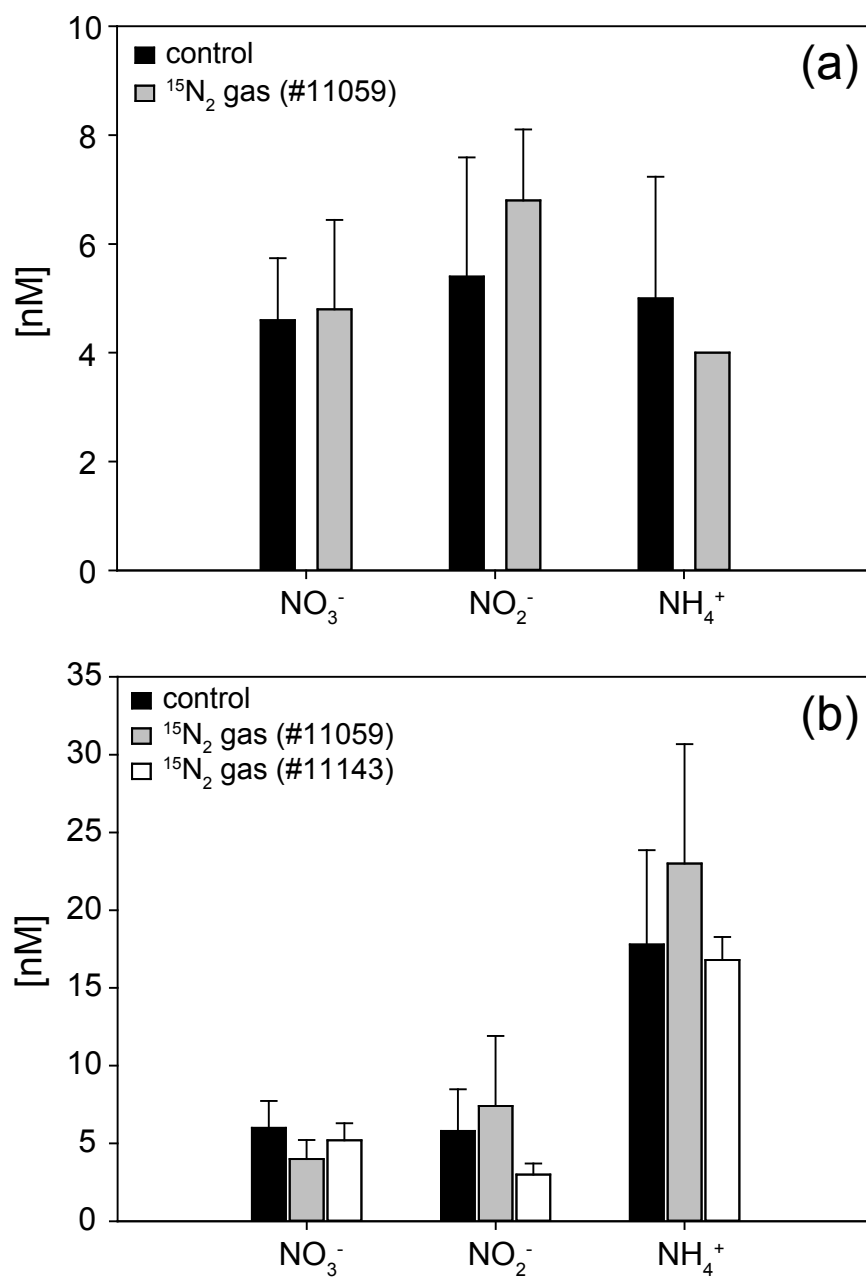

Fig. S1 Nitrate, nitrite, and ammonium concentration in control and  $^{15}\text{N}_2$ -gas added waters in experiment (a) 1 and (b) 2. Error bars indicate standard deviations of the mean (n=5).

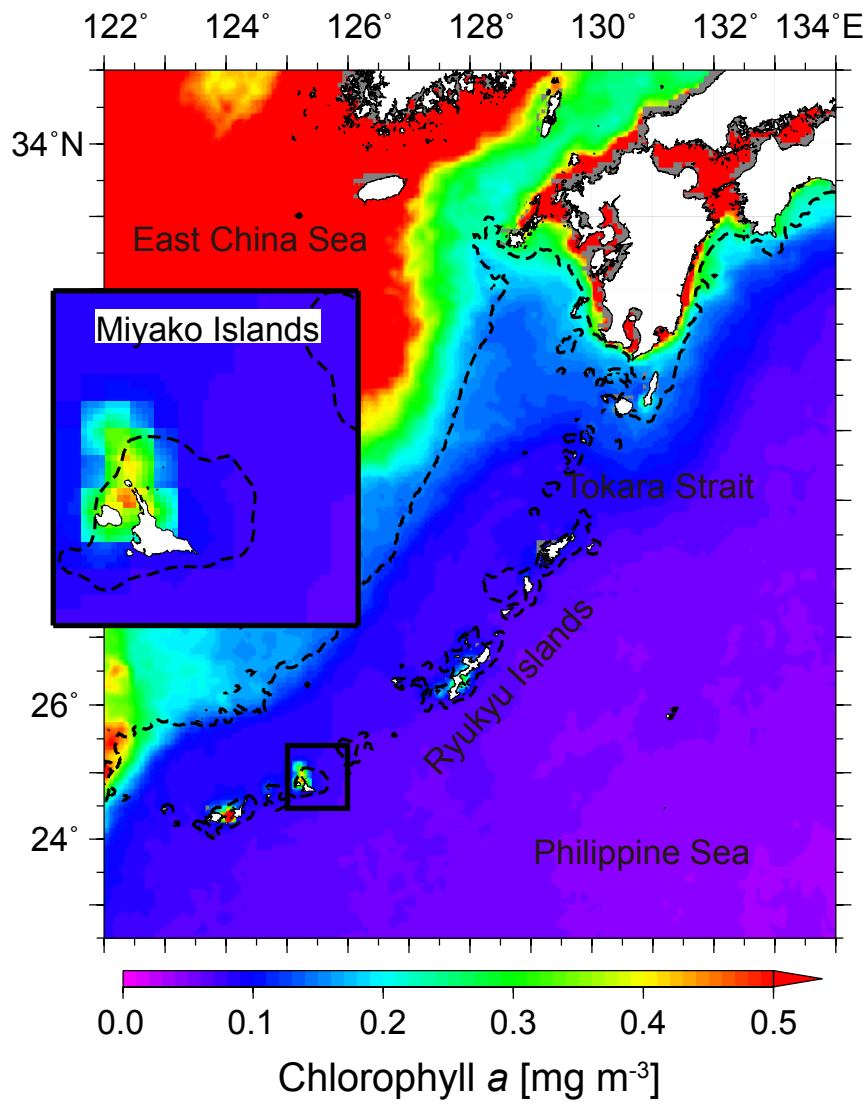

Fig. S2 Satellite-derived average chlorophyll *a* during the summer from July 2003 to September 2009. Dashed lines indicate 200 m isobaths.

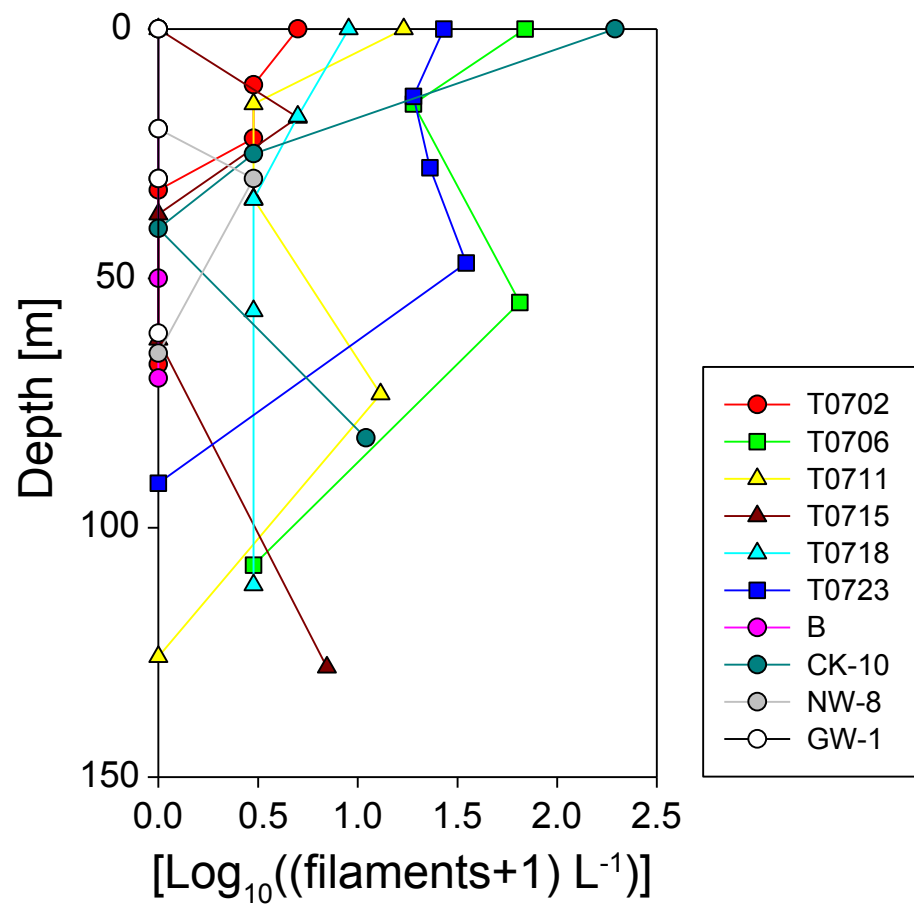

Fig. S3 Vertical profiles of *Trichodesmium* spp. during the *Nagasaki-maru* 242 and KT-07-21 cruises

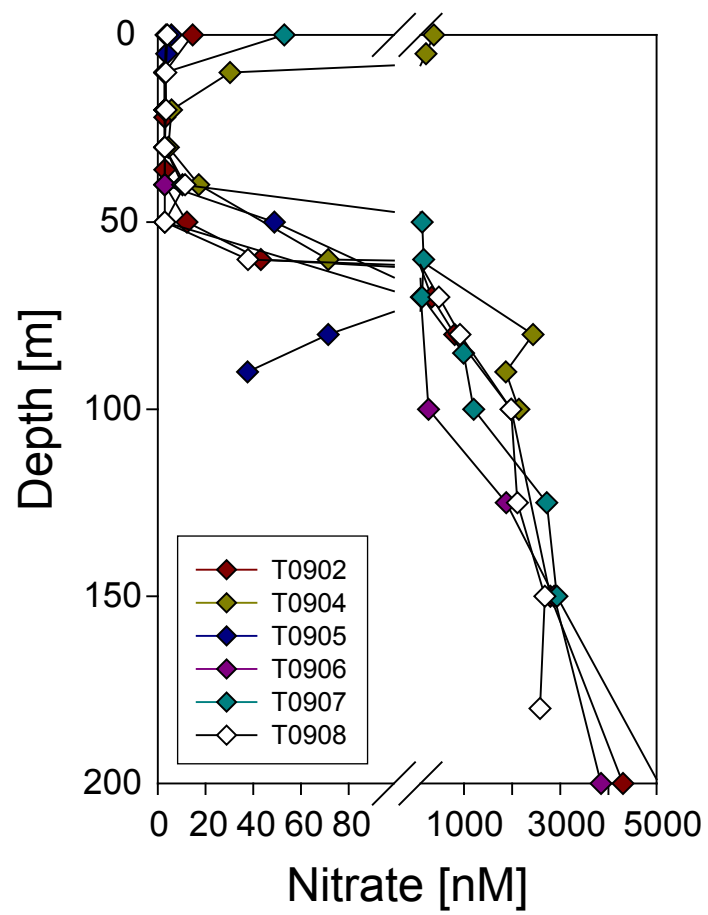

Fig. S4 Vertical profiles of nitrate during the KT-09-17 cruise

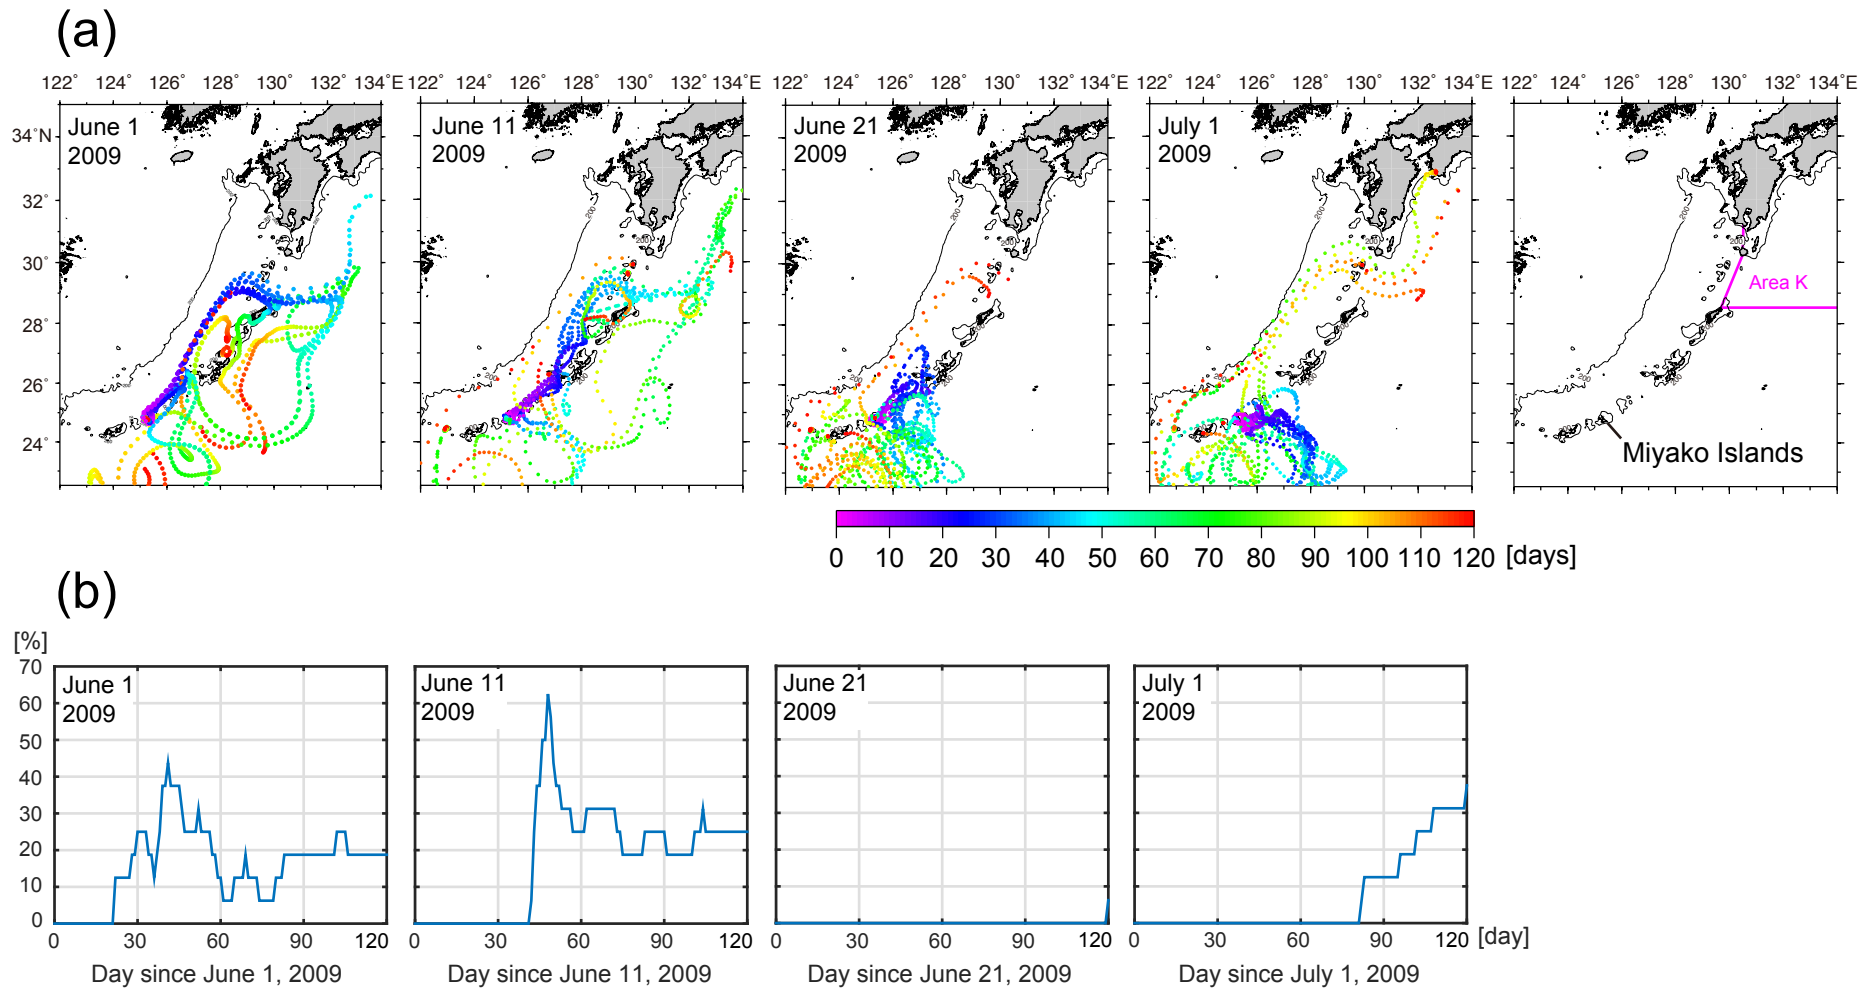

Fig. S5 (a) Particle trajectories released from points around the Miyako Islands on June 1, June 11, June 21, and July 1, 2009. (b) The ratio of particles delivered to Area K to the total released particles.

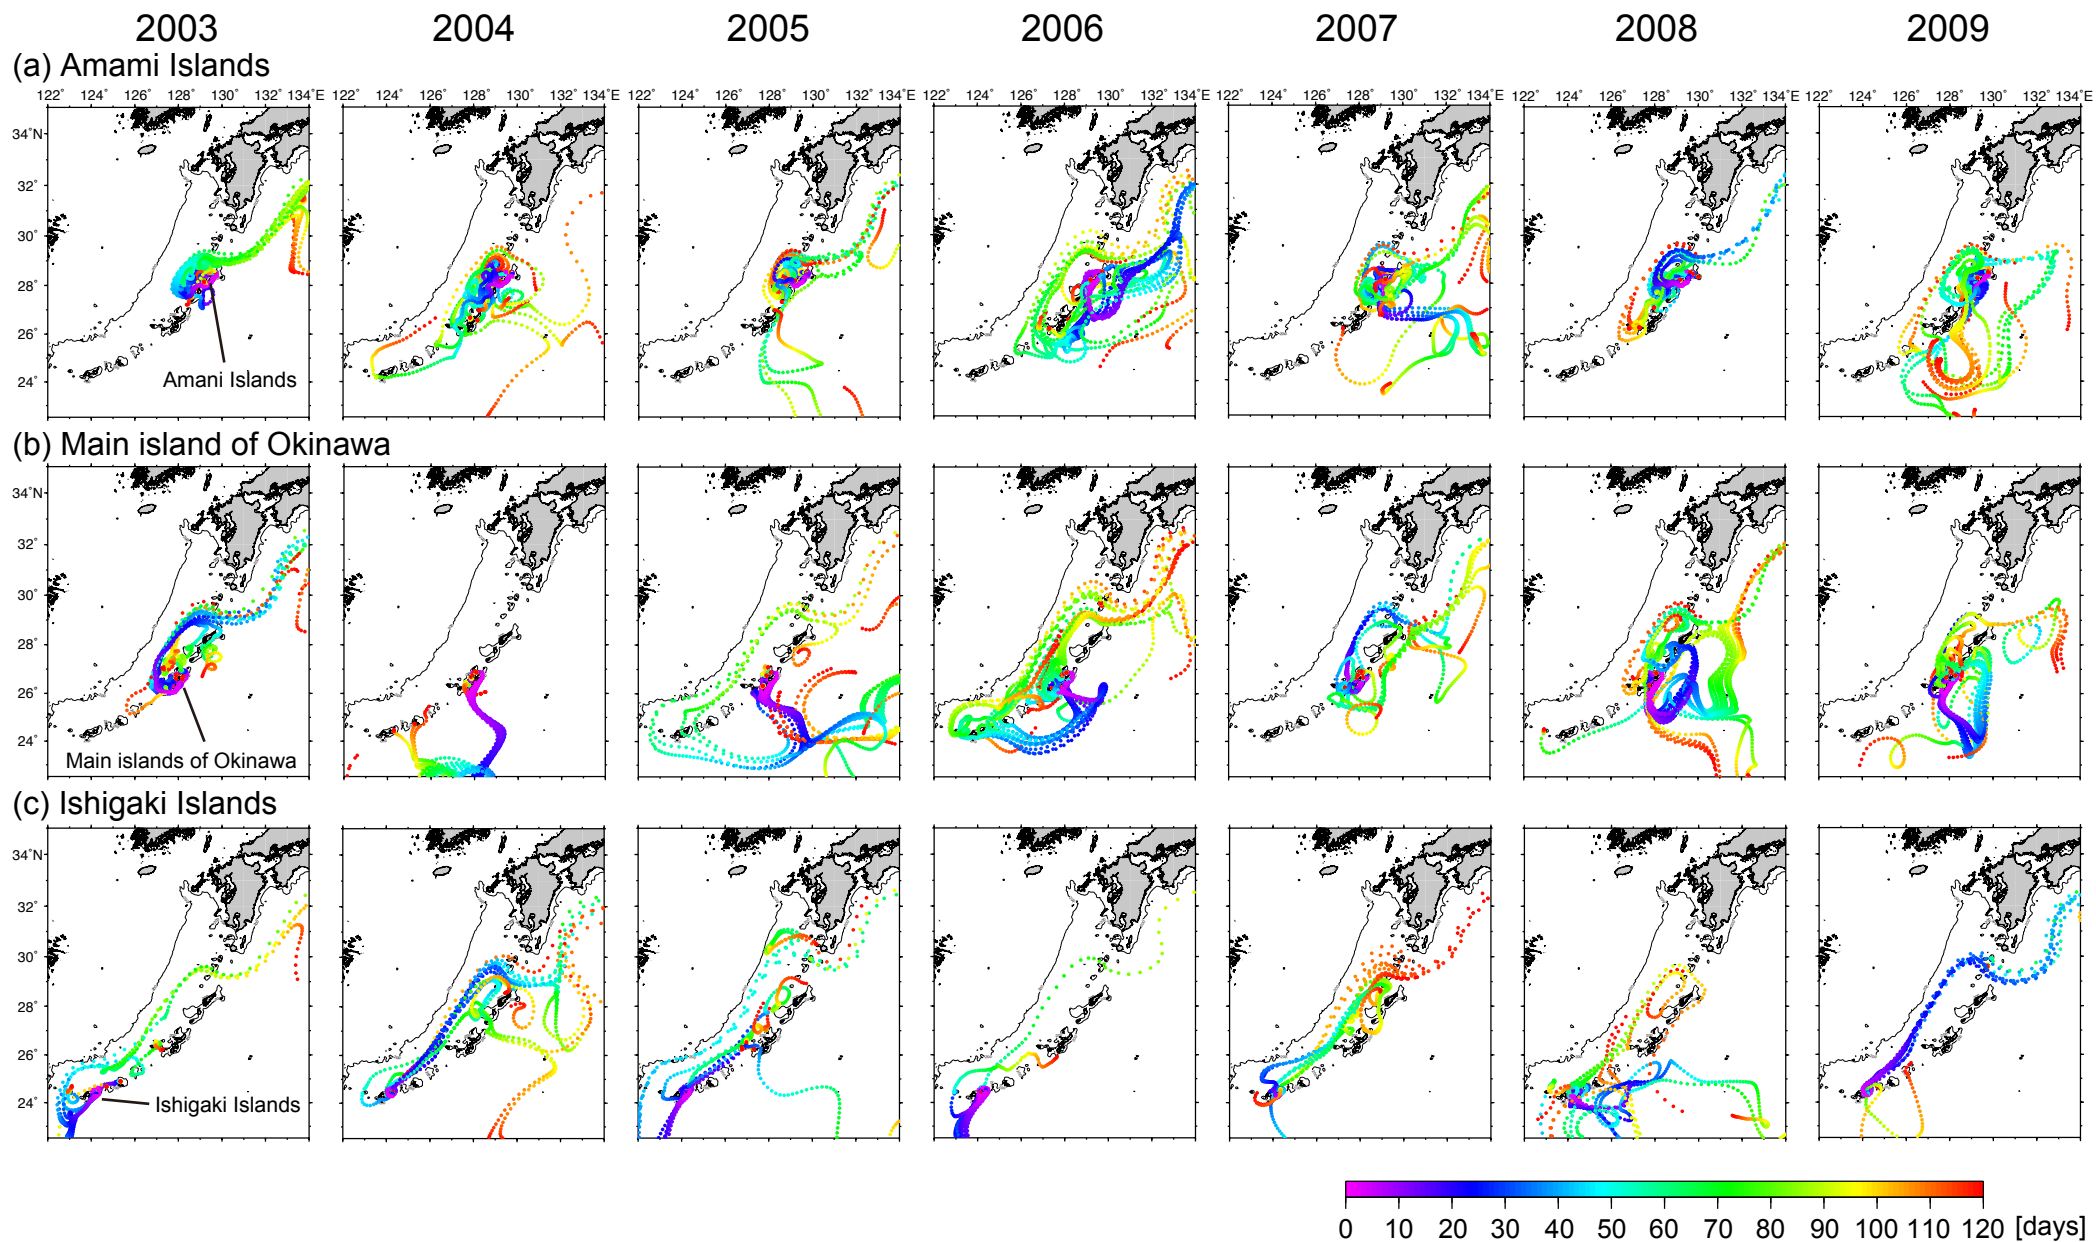

Fig. S6 Particle trajectories from the release points around (a) Amami Islands, (b) Main island of Okinawa, and (c) Ishigaki Islands. The released points of particles were selected at model grid points around the coastal waters of each island



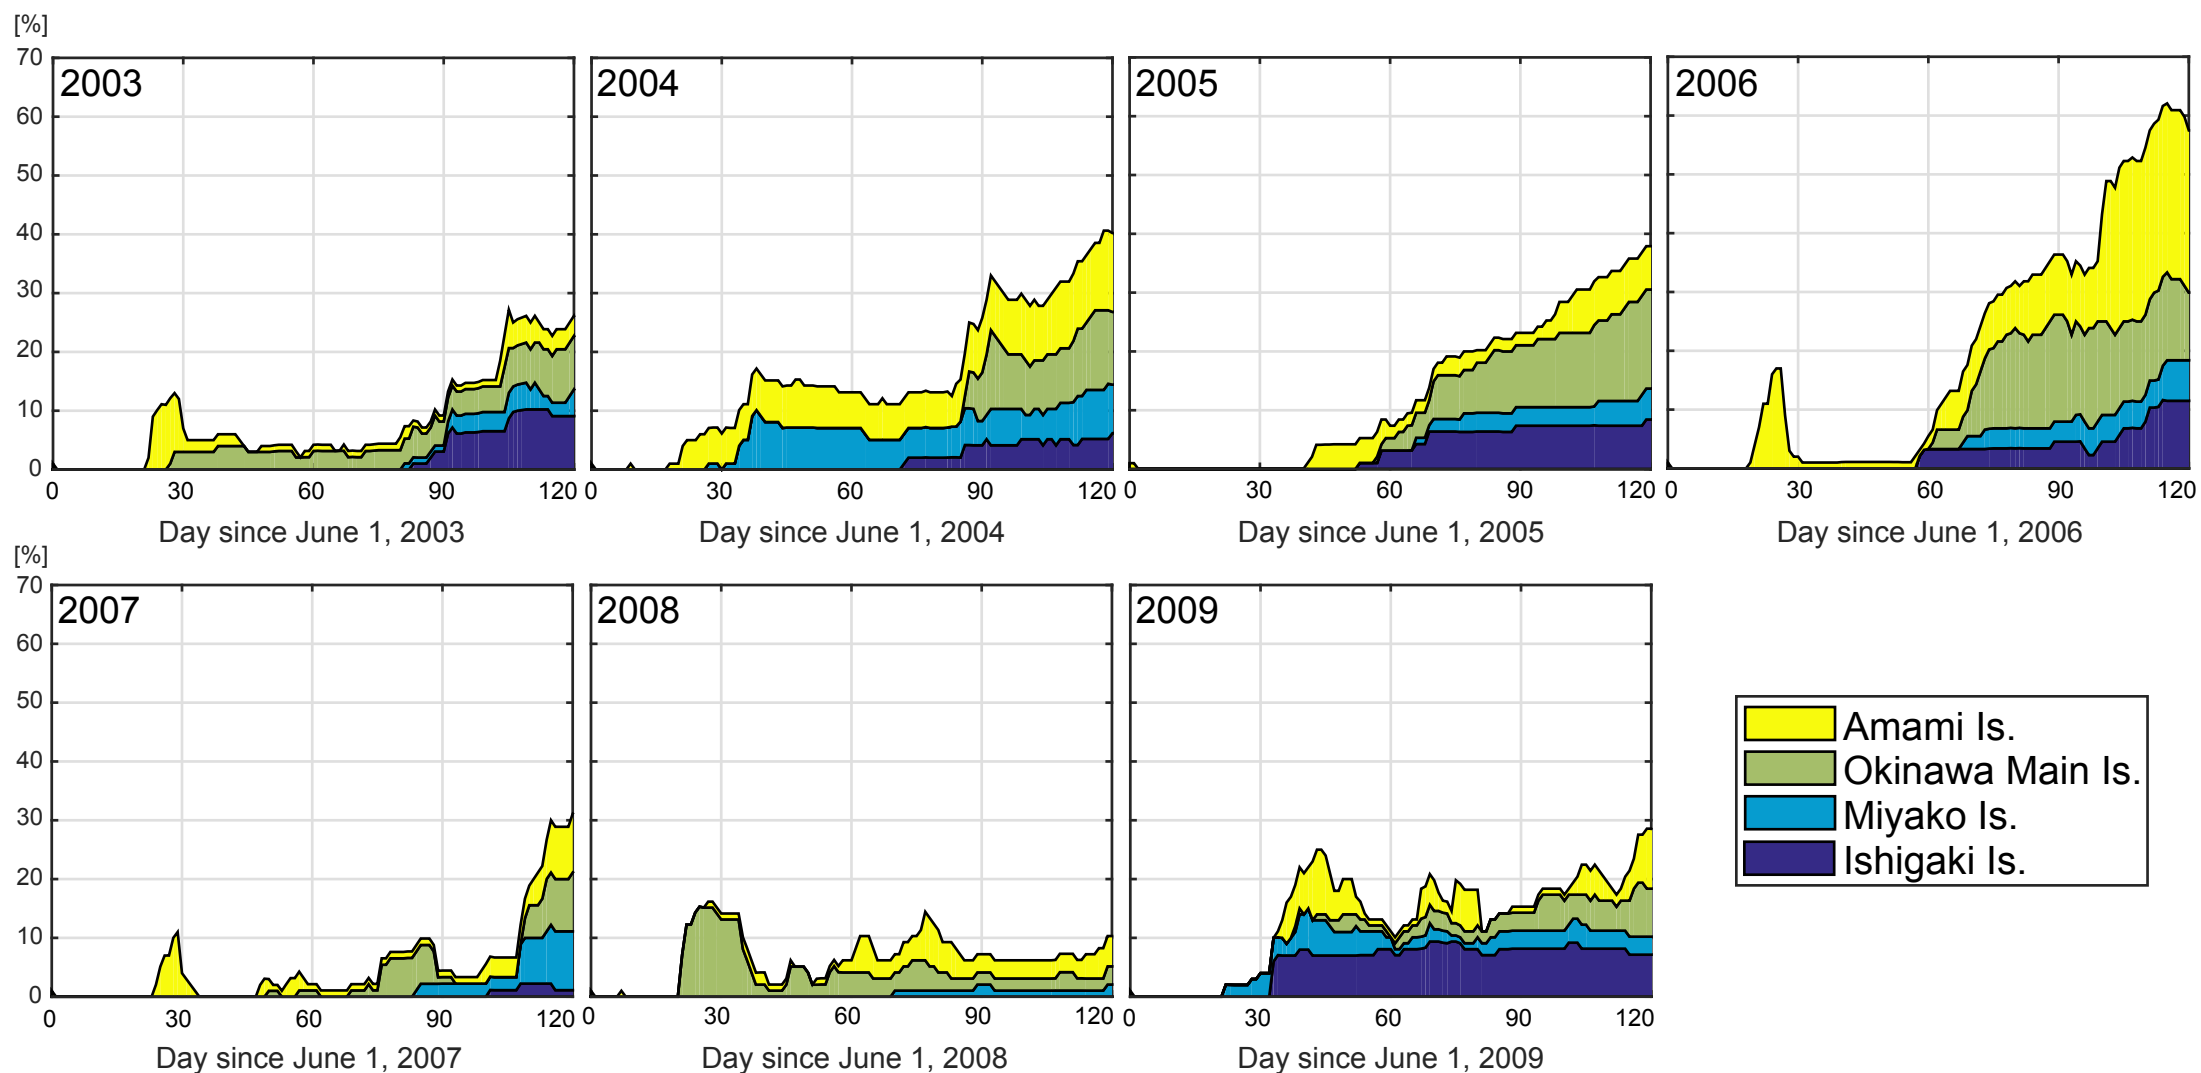

Fig. S7 The ratio of particles delivered to Area K from the Ishigaki Islands, Miyako Islands, Okinawa Main Island, Amami Islands to the total released particles from all islands
